1  
2  
3  
4  
5  
6  
7  
8  
9  
10  
11  
12  
13  
14  
15  
16  
17  
18  
19

**A low-dimensional approximation of optimal confidence**

Pierre Le Denmat<sup>1</sup>, Tom Verguts<sup>2</sup>, Kobe Desender<sup>1</sup>

1. Brain and Cognition, KU Leuven, Belgium.
2. Department of Experimental Psychology, Ghent University, Belgium

**Corresponding author:**

Pierre Le Denmat

Brain and Cognition

KU Leuven

Tiensestraat 102, 3000 Leuven

Belgium

Classification : SOCIAL SCIENCES - Psychological and Cognitive Sciences

**Key words: confidence; metacognition; decision making; drift diffusion model**

20

**Abstract (230/250 words)**

21 Human decision making is accompanied by a sense of confidence. According to Bayesian decision  
22 theory, confidence reflects the learned probability of making a correct response, given available data  
23 (e.g., accumulated stimulus evidence and response time). Although optimal, independently learning  
24 these probabilities for all possible combinations of data is computationally intractable. Here, we  
25 describe a novel model of confidence implementing a low-dimensional approximation of this optimal  
26 yet intractable solution. Using a low number of free parameters, this model allows efficient  
27 estimation of confidence, while at the same time accounting for idiosyncrasies, different kinds of  
28 biases and deviation from the optimal probability correct. Our model dissociates confidence biases  
29 resulting from individuals' estimate of the reliability of evidence (captured by parameter  $\alpha$ ), from  
30 confidence biases resulting from general stimulus-independent under- and overconfidence (captured  
31 by parameter  $\beta$ ). We provide empirical evidence that this model accurately fits both choice data  
32 (accuracy, response time) and trial-by-trial confidence ratings simultaneously. Finally, we test and  
33 empirically validate two novel predictions of the model, namely that 1) changes in confidence can be  
34 independent of performance and 2) selectively manipulating each parameter of our model leads to  
35 distinct patterns of confidence judgments. As the first tractable and flexible account of the  
36 computation of confidence, our model provides concrete tools to construct computationally more  
37 plausible models, and offers a clear framework to interpret and further resolve different forms of  
38 confidence biases.

39

40

**Significance statement (119/120 words)**

41 Mathematical and computational work has shown that in order to optimize decision making, humans  
42 and other adaptive agents must compute confidence in their perception and actions. Currently, it  
43 remains unknown how this confidence is computed. We demonstrate how humans can approximate  
44 confidence in a tractable manner. Our computational model makes novel predictions about when  
45 confidence will be biased (e.g., over- or underconfidence due to selective environmental feedback).  
46 We empirically tested these predictions in a novel experimental paradigm, by providing continuous  
47 model-based feedback. We observed that different feedback manipulations elicited distinct patterns  
48 of confidence judgments, in ways predicted by the model. Overall, we offer a framework to both  
49 interpret optimal confidence and resolve confidence biases that characterize several psychiatric  
50 disorders.

51

## Introduction

52           Decision confidence refers to a subjective feeling reflecting how confident agents feel about  
53 the accuracy of their decisions. This feeling of confidence closely tracks the objective accuracy (1):  
54 people usually report high confidence for correct trials and low confidence for errors. This  
55 observation is in line with the theoretical proposal that confidence reflects the Bayesian posterior  
56 probability that a decision is correct given available data (1–3). As such, confidence represents  
57 valuable information that is taken into account to guide adaptive behavior, including learning (4–6);  
58 speed-accuracy tradeoff adjustments (7, 8); and information seeking (9). Therefore, having an  
59 accurate sense of confidence that best matches one’s accuracy is of utmost importance to maintain  
60 adaptive behavior. Dissociations between confidence and accuracy are widespread, however, most  
61 prominently in cases of blindsight (10), change blindness (11) and patients with anterior prefrontal  
62 lesions (12). Such dissociations pose a serious challenge for the Bayesian interpretation of  
63 confidence. More importantly, estimating the Bayesian probability with limited data is  
64 computationally intractable. In this work, we reconcile these findings by proposing and empirically  
65 validating a low-dimensional approximation to the Bayesian probability, offering both a tractable and  
66 flexible model for the computation of decision confidence.

67           Most attempts at modeling decision confidence have done so within the context of existing  
68 models of decision making. One highly influential account is based on the idea that decision making  
69 reflects a process of noisy accumulation of evidence until a decision boundary is reached (13). For  
70 example, the drift-diffusion model (DDM) describes the decision-making process as the noisy  
71 accumulation of evidence in favor of one of two options. Here, evidence accumulates with a certain  
72 drift rate (representing the efficiency of evidence accumulation) until reaching a decision threshold,  
73 at which point a response is issued. Several approaches have been put forward to account for  
74 confidence within the DDM framework (14–16). The most prominent approach relies on the Bayesian  
75 interpretation of confidence, modeling it as the probability of a choice being correct given the  
76 available data. Within the drift diffusion model, the available data to participants is the amount of  
77 accumulated evidence and the time spent accumulating, which are then combined into a probability  
78 that the decision was correct (2, 15). Such formalization of decision confidence is sometimes referred  
79 to as the “Bayesian readout” (17). This Bayesian readout can be represented as a heatmap on the  
80 two-dimensional (data) space formed by both evidence and time. In Figure 1A, it can be seen that the  
81 Bayesian readout hypothesis predicts that confidence will be higher for trials with more accumulated  
82 evidence (reflected on the y-axis) and lower for trials with a longer decision duration (reflected on  
83 the x-axis). Consistent with these predictions, confidence indeed depends on evidence strength (1, 2)

84 and on elapsed decision time (14). More generally, this modeling approach has been successful in  
85 explaining a wealth of data (17–19).

86 To compute confidence by reading out the probability correct given evidence and time,  
87 humans must have an accurate representation of the entire space created by crossing these two  
88 variables (i.e. the heatmap shown in Figure 1A). Previous accounts propose that individuals learn this  
89 mapping via experience (2). However, learning all positions on this heatmap would either take a lot  
90 of time or yield very noisy estimates. Thus, tractability is a key issue that needs to be addressed in  
91 order to understand how humans learn the probability correct given evidence and time. Therefore, in  
92 the current work we propose the Low-Dimensional Confidence (LDC) model, a simple yet efficient  
93 low-dimensional approximation of the optimal yet intractable Bayesian readout. In the following  
94 sections, we describe how LDC allows to tractably compute the mapping from evidence and time to  
95 confidence. Using simulated data, we show that LDC provides a close approximation of Bayesian  
96 confidence. We then proceed to test and validate our model with human data.

## 97 Results

### 98 The Low-Dimensional approximation of Confidence model (LDC model)

99 Constructing an accurate representation of confidence based on a limited number of samples  
100 is infeasible. However, under standard DDM assumptions, the probability of a correct choice given  
101 accumulated evidence and elapsed time can be expressed as the probability of drift rate  $v$  being  
102 positive in case of upper boundary hit (and conversely  $p(v < 0)$  in the lower boundary hit case).  
103 Such probability is characterized as (15):

$$p(v > 0|e, t) = \Phi\left(\frac{e}{\sigma\sqrt{t}}\right) \quad (1)$$

104 where  $e$  is the accumulated evidence,  $t$  is the elapsed time,  $\Phi$  is the cumulative distribution function  
105 of the standard normal distribution and  $\sigma$  is the within-trial noise of the DDM accumulator. Given  
106 that  $\Phi$  is an integral without closed-form solution, it requires an infinite number of standard  
107 operations to be computed. We propose to approximate  $\Phi$  with a more tractable logistic function  
108 (20):

$$\Phi\left(\frac{e}{\sigma\sqrt{t}}\right) \approx \frac{1}{1 + \exp\left(-\lambda \frac{e}{\sigma\sqrt{t}}\right)} \quad (2)$$

109  
110 where  $\lambda \approx 1.7$  is a constant that optimizes the approximation (20). In its current form, the  
111 formalization of confidence proposed in Eq. (2) cannot account for idiosyncrasies (21), diverse types

112 of confidence biases and deviations from the optimal probability of a correct choice typically  
113 observed in empirical work (22–24). In order to make the formulation of confidence more flexible we  
114 thus further parameterize confidence in the following way:

$$Confidence = \frac{1}{1 + \exp\left(-\frac{1}{\sqrt{t}}(x\alpha e + \beta)\right)} \quad (3)$$

115 where  $x \in \{-1; 1\}$  is the choice. The two free parameters of this equation capture how strongly  
116 individuals weigh evidence in their computation of confidence ( $\alpha$ ); and a stimulus-independent  
117 confidence bias ( $\beta$ ). A positive confidence bias ( $\beta > 0$ ) implies that the model has a general tendency  
118 to be overconfident. If  $\beta = 0$ , the model is unbiased and bases its confidence purely on the evidence  
119 accumulated and the time spent accumulating. A negative confidence bias ( $\beta < 0$ ) indicates overall  
120 underconfidence.

121 As a weighting parameter on evidence,  $\alpha$  can be interpreted as individuals' estimate of the  
122 reliability of evidence. Intuitively, if one thinks that the accumulated evidence is not reliable, one will  
123 need more evidence to be sure that the decision was correct. When  $\alpha$  is decreased, one puts less  
124 importance on accumulated evidence to compute confidence. In the extreme case where  $\alpha = 0$ , the  
125 model completely ignores evidence and the computation of confidence is entirely driven by  $\beta$  and  
126 time. If additionally  $\beta = 0$ , then confidence will always be .5. At the other end of the spectrum, if  $\alpha$   
127 tends to infinity, then the smallest amount of evidence will lead to extreme confidence judgments  
128 (i.e. either confidence = 1 if  $ev > 0$  or confidence = 0 if  $ev < 0$ ). Given that accumulated evidence is  
129 noisy, an individual with an overly high  $\alpha$  likely treats evidence as more reliable than it actually is.

### 130 **Simulations: The LDC model closely resembles Bayesian confidence**

131 The aim of the current work is to provide a tractable and flexible approximation of the  
132 Bayesian readout of confidence. A first test of the LDC model is whether it can effectively  
133 approximate the Bayesian readout of confidence. For this sake, we generated data from 100  
134 simulated participants from a range of typically observed DDM parameters. Our model was then fit  
135 to the true Bayesian posterior probability correct conditional on evidence, time and choice. LDC-  
136 predicted confidence almost perfectly correlated with the true probability of being correct  
137 (Spearman  $r(999998) = .99$ ,  $p < .001$ ). This close resemblance can be appreciated visually by  
138 comparing the model-based heatmap (created based on the estimated parameters; Figure 1B) to the  
139 heatmap based on the simulations (Figure 1A).

140 To further show that our model closely tracks the Bayesian readout of confidence, we tested  
141 its ability to reproduce three statistical signatures that confidence should adhere to if it does reflect a

142 Bayesian probability (Sanders et al., 2016). The three qualitative signatures are 1) confidence predicts  
143 choice accuracy, 2) confidence increases with evidence strength for correct trials, but decreases with  
144 evidence strength for error trials (commonly called the folded X-pattern; 25, 26) and 3) for any level  
145 of evidence strength above 0, high confidence trials should be linked with higher accuracy than low  
146 confidence trials. As can be assessed on Figure 1C, the simulated data showed an excellent fit to the  
147 signatures.

148

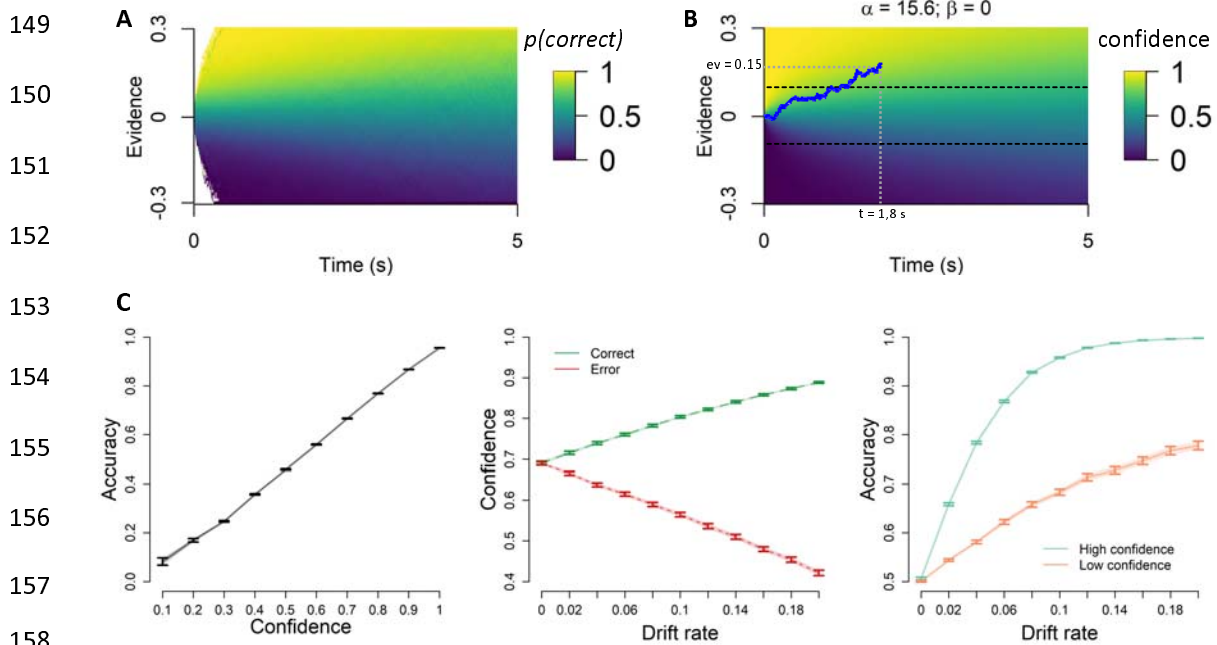

159 **Figure 1.** A. Confidence is thought to represent the Bayesian probability of a choice being correct conditional  
160 on evidence, time and choice. Within this theory, confidence is quantified as this probability, represented by  
161 the color on the heatmap. B. Because this optimal solution is intractable, the LDC model proposes a low-  
162 dimensional parametrization of this framework, which allows efficient estimation of confidence, while  
163 accounting for idiosyncrasies and confidence biases. The LDC model can generate a heatmap representing  
164 confidence which closely approximates the optimal Bayesian probability. Values of  $\alpha$  and  $\beta$  were obtained by  
165 fitting the LDC model to the Bayesian probability of being correct over 1 000 000 simulated trials. Confidence  
166 for the trial plotted on top of the heatmap is given by Eq. (3). Here, confidence = .85. C. To show the  
167 effectiveness of the LDC model we generated three statistical signatures of confidence (Sanders et al. 2016)  
168 based on the Bayesian read-out of confidence (error bars reflecting SEM, simulated  $N = 100$ ) and based on the  
169 LDC model fits (shaded lines reflecting SEM).

170

## 171 Empirically testing predictions of the LDC model

172 Having demonstrated that the LDC model can closely approximate the Bayesian readout of  
173 confidence on synthetic data, we next turned to empirical data from human participants. We tested  
174 two key predictions of the LDC model. First, the LCD model predicts that changes in confidence can

175 be independent of performance. The two free parameters only describe how evidence and time are  
176 combined into a confidence judgment, but they do not affect the process that leads to specific levels  
177 of accumulated evidence and elapsed time. Any manipulation that selectively targets confidence  
178 while leaving performance unaffected should thus be captured by changes in  $\alpha$  and/or  $\beta$ . A second  
179 novel prediction is that selective changes in each parameter of our model should lead to distinct  
180 modulations of confidence judgments. Thus, a manipulation targeting reliability ( $\alpha$ ) should lead to  
181 qualitatively distinct changes in confidence ratings compared to a manipulation targeting confidence  
182 bias ( $\beta$ ).

### 183 ***Experiment 1: The LDC model accounts for performance-independent changes in confidence***

184 We first tested a crucial prediction of our model, namely that changes in confidence can  
185 occur independent of changes in performance (9, 27–29). Although such dissociations have been  
186 observed since several decades (e.g., blindsight; Weiskrantz et al., 1974), they pose a serious  
187 challenge for most current models of confidence. The LDC model naturally accounts for such  
188 dissociations. One particularly strong dissociation was observed in our recent work (19), in which a  
189 manipulation of participants' prior belief about their ability to perform a task selectively influenced  
190 their reported levels of confidence. In Experiment 1 of that paper, participants performed three  
191 perceptual tasks consecutively, each divided into a training and a testing phase (Figure 2). During the  
192 training phase, participants received feedback about their performance every 24 trials. Although  
193 participants were told that the feedback indicated how well they performed the task compared to a  
194 reference group, in reality the feedback was made up. Within each task, feedback indicated that  
195 performance was worse than of most other participants (*negative condition*); that it was on average  
196 (*average condition*); or that it was better than of most other participants (*positive condition*). During  
197 the testing phase, participants no longer received feedback; instead, they rated their confidence at  
198 the end of each trial. We observed a direct influence of the feedback manipulation on confidence,  
199 with more positive feedback leading to higher confidence,  $F(2,47) = 16.65$ ,  $p < .001$ . Importantly, this  
200 effect of feedback on confidence was not explained by objective performance, as reaction time (RT)

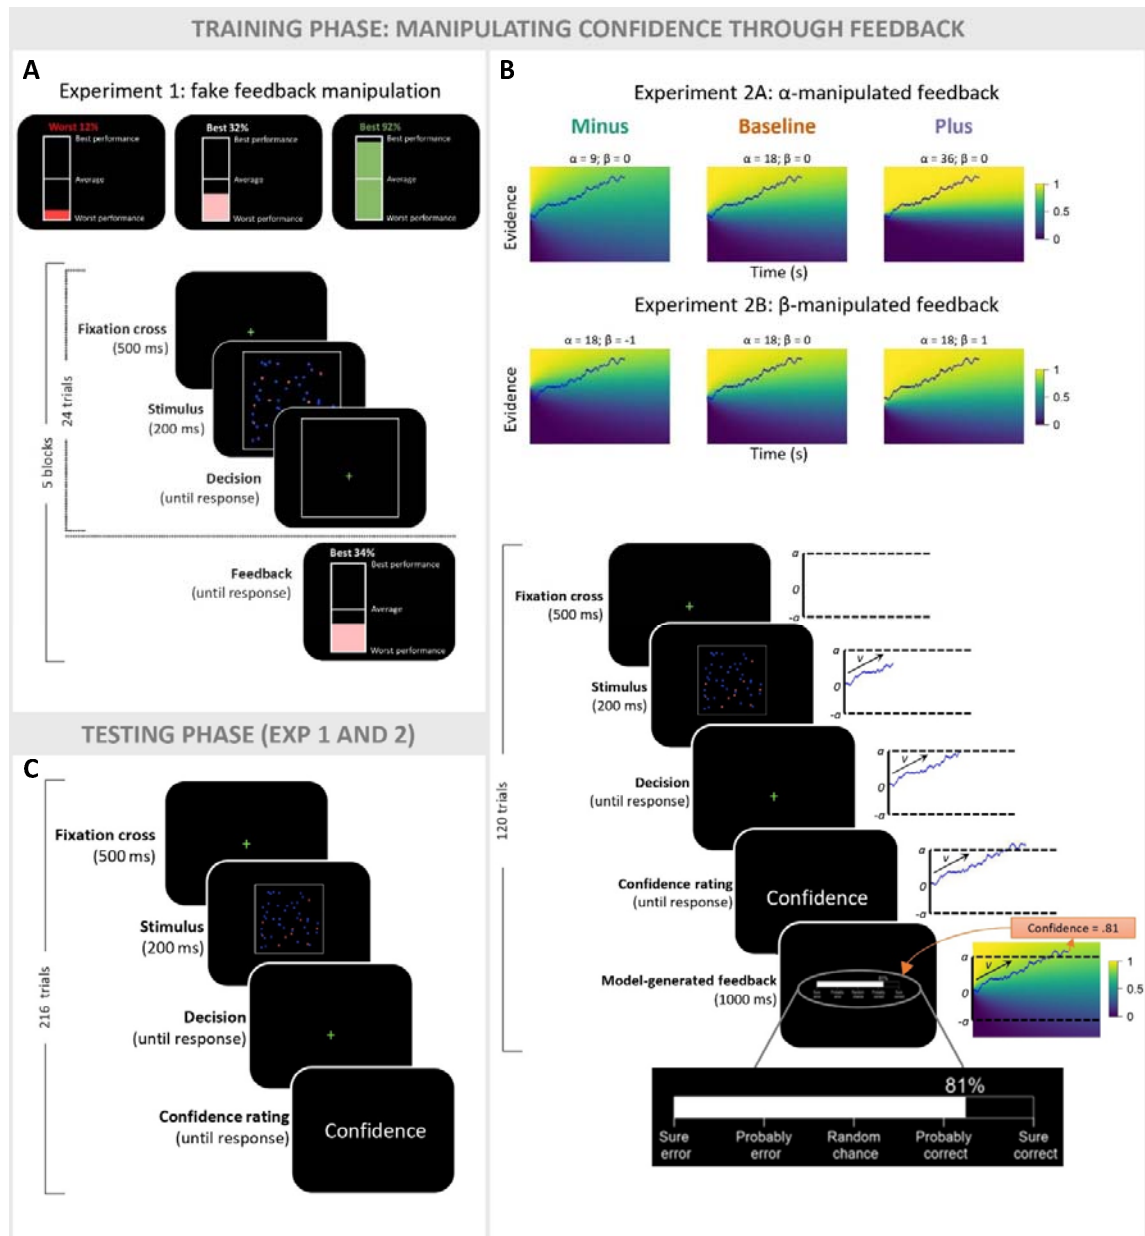

201

202 **Figure 2. Experimental design.** In both experiments, participants performed three different perceptual  
 203 decision-making tasks (only one shown here). Each task started with a training phase during which a different  
 204 feedback manipulation was induced. **A.** In Experiment 1, participants received fake feedback after each training  
 205 block, framed as a comparison between their performance and the performance of a reference group. **B.** In  
 206 Experiment 2, participants additionally rated their confidence before receiving trial-by-trial feedback reflecting  
 207 their probability of making the correct choice. Unknown to participants, the feedback was actually generated  
 208 by the LDC model behind the curtain. To do so, the evidence accumulation process for each trial was estimated  
 209 using the mean drift rate and boundary from a previous pilot session (see Methods for full details). Feedback  
 210 conditions differed in the  $\alpha$  (resp.  $\beta$ ) value used to generate feedback in Experiment 2A (resp. Experiment 2B).  
 211 **C.** In both experiments, after each training phase participants completed a test phase during which they no  
 212 longer received feedback but rated their decision confidence after each decision.

213



214 and accuracy did not change as a function of feedback (accuracy:  $X^2(2) = 0.3$ ,  $p = .863$ ; RT:  $F(2,48) =$   
215  $2.06$ ,  $p = .14$ ).

216 We fitted the LDC model to the performance (accuracy and RT) and confidence reports in the  
217 test phase of this experiment, separately for each participant. LDC model predictions were then  
218 generated using the best fitting parameters for each individual. As can be seen in Figure 3, the LDC  
219 model provided an excellent fit to the data. Similar to the empirical data, feedback significantly  
220 influenced model-generated confidence ratings ( $F(2,48) = 9.79$ ,  $p < .001$ ), but did not influence the  
221 performance data (RT:  $F(2,48) = 1.19$ ,  $p = .31$ ; Accuracy:  $X^2(2) = .75$ ,  $p = .69$ ). Thus, our model was  
222 able to capture the data pattern, namely that confidence reports can be influenced independently  
223 from behavioral performance.

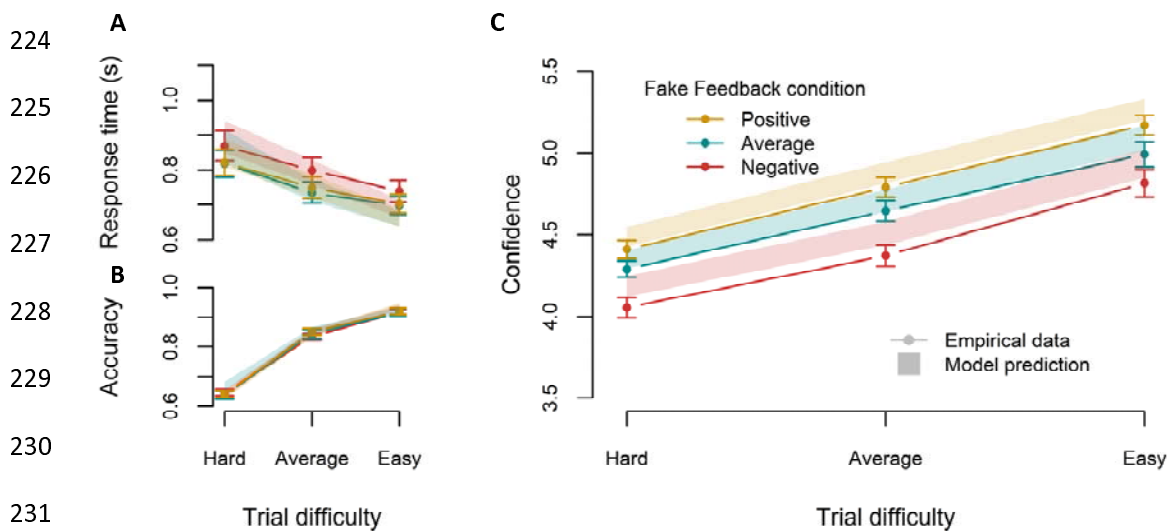

232 **Figure 3.** A key prediction of the LDC model is that confidence can vary independent from task performance. **A.**  
233 In Experiment 1, providing participants with fake feedback telling them their performance was better, equal or  
234 worse than a reference group indeed left RT unaffected. **B.** Same with accuracy. **C.** On the other hand, fake  
235 feedback selectively influenced the reported level of confidence on correct trials. These results were closely  
236 captured by fitting the LDC model to these data. *Note: Solid lines represent empirical data. Shades and error*  
237 *bars represent standard error of the mean for predictions of the LDC model and empirical data, respectively.*

238 We next investigated the estimated parameters of the model. Given that feedback  
239 selectively influenced confidence ratings, we expected a significant change in the confidence-specific  
240 parameters (i.e.,  $\alpha$  or  $\beta$ ), but no variation in the DDM parameters (non-decision time, drift rate,  
241 decision threshold). Indeed, feedback had an influence on estimated  $\alpha$  ( $F(2,382) = 6.56$ ,  $p = .0016$ )  
242 and  $\beta$  ( $F(2,382) = 8.32$ ,  $p < .001$ ). Tukey's test for multiple comparisons found that estimated  $\alpha$  was  
243 lower in the negative condition than in the other two conditions (negative vs average:  $p = .01$ ;  
244 negative vs positive:  $p = .002$ ), whereas there was no difference in  $\alpha$  between the average and  
245 positive conditions ( $p = .88$ ). In a similar vein,  $\beta$  was higher in the positive condition compared to the  
246 other two (positive vs average:  $p = .004$ ; positive vs negative:  $p < .001$ ), whereas there was no

247 difference between the negative and average conditions ( $p = .83$ ). Finally, as expected estimated  
248 DDM parameters did not vary with feedback condition (drift rate:  $F(2,48) = .18$ ,  $p = .84$ ; non-decision  
249 time:  $F(2,382) = 0.99$ ,  $p = .37$ ) except for a minor effect on decision threshold ( $F(2,382) = 3.30$ ,  $p =$   
250  $.038$ ). Post-hoc tests for the decision threshold revealed a slightly higher threshold in the negative  
251 condition compared to the positive condition and no difference with the other contrasts (negative -  
252 average:  $p = .14$ ; negative - positive:  $p = .04$ ; average - positive:  $p = .85$ ).

### 253 ***Experiment 2: Dissociating parameter-specific effects on confidence ratings***

254 Our final aim was to demonstrate that humans are sensitive to the specific parameterization  
255 of decision confidence proposed by the LDC framework. If confidence is computed using a low-  
256 dimensional solution, it should be possible to independently manipulate its parameters. Therefore, in  
257 a new set of two experiments, we aimed to induce selective changes in each parameter (reliability  
258 ( $\alpha$ ) or bias ( $\beta$ )) of the model.

259 The general design of both experiments was similar to Experiment 1: we manipulated the  
260 feedback during a training phase and investigated the impact of that manipulation on confidence  
261 ratings reported in a subsequent testing phase. Rather than presenting fake feedback every 24 trials,  
262 we adopted a novel approach where feedback during the training phase was presented after each  
263 trial in the form of a continuous value (Figure 2). Participants were told that this value reflected the  
264 probability that their response was correct (e.g.,  $.8$  vs  $.4$  indicating that there was a high vs low  
265 probability that they just made a correct choice). Unknown to participants the exact feedback value  
266 was generated by LDC behind the curtain (see Methods for full details). Both experiments comprise a  
267 baseline condition ( $\alpha = 18$ ;  $\beta = 0$ ) in which the feedback presented to participants reflected the  
268 model-approximated probability of a choice being correct. In Experiment 2A, the value of  $\alpha$  that was  
269 used to generate the feedback was selectively manipulated between conditions. In addition to the  
270 baseline condition there was a minus condition where  $\alpha$  was decreased ( $\alpha = 9$ ), and a plus condition  
271 where  $\alpha$  was increased ( $\alpha = 36$ ). In Experiment 2B, the same procedure was used except that now the  
272 value of  $\beta$  was selectively manipulated between conditions ( $\beta = -1$  in the minus condition and  $\beta = 1$  in  
273 the plus condition).

274 **A dissociable effect of manipulated feedback on confidence according to the parameter**  
275 **manipulated.** As previously described, the reliability parameter  $\alpha$  reflects how strongly individuals  
276 weigh evidence in their computation of confidence. Given that accuracy is closely related to the  
277 amount of available evidence, correct trials tend to have considerable supporting evidence when  
278 reporting confidence, whereas error trials usually have little to no supporting evidence. Given that  $\alpha$   
279 weighs evidence, a decrease (in the  $\alpha$ -minus condition) or an increase (in the  $\alpha$ -plus condition) of  $\alpha$  is

280 therefore expected to differently impact confidence for correct trials (strong influence) than for error  
281 trials (little to no influence). In contrast, the parameter  $\beta$  reflects a stimulus-independent confidence  
282 bias, so providing participants with  $\beta$ -manipulated feedback is expected to lead to changes in  
283 confidence irrespective of choice accuracy. The reasoning for this prediction is that  $\beta$  is not  
284 concerned with the evidence provided by the stimulus (nor by the response), as it simply adds (in the  
285  $\beta$ -plus condition) or subtracts (in the  $\beta$ -minus condition) a constant to the (logit of the) confidence  
286 judgment regardless of what happens during the trial.

287 These intuitions are further illustrated in Figure 4A and 4B, which show the actual (i.e.,  
288 manipulated) feedback that was presented to participants during the training phase of our  
289 experiments. Confirming the above intuition, there was an interaction in Experiment 2A between  
290 accuracy and the value of  $\alpha$  ( $F(2,12623) = 76.73, p < .001$ ): feedback was more positive when  
291 generated by a higher  $\alpha$  when considering correct trials only ( $F(2,9911) = 723.77, p < .001$ ), but did  
292 not change when considering error trials only,  $F(2,44) = 1.41, p = .25$ . For Experiment 2B, although  
293 there was a significant interaction between  $\beta$  value and accuracy ( $F(2,10589) = 43.11, p < .001$ ),  
294 feedback was more positive when generated by a higher  $\beta$  both when taking corrects ( $F(2,8420) =$   
295  $2260.84, p < .001$ ) and errors ( $F(2,35) = 183.56, p < .001$ ) separately.

296 **Behavioral results.** We now turn to the effects of the feedback manipulations on the testing phase  
297 data. The results concerning task performance were as expected: we found no effect of feedback  
298 condition on performance (RT and accuracy) in the testing phase of Experiment 2A (RT:  $F(2,40) = .15,$   
299  $p = .86$ ; Accuracy:  $\chi^2(2) = 3.54, p = .17$ ) and Experiment 2B (RT:  $F(2,32) = .24, p = .79$ ; Accuracy:  $\chi^2(2) =$   
300  $1.09, p = .58$ ). There was, however, the expected effect of trial difficulty on performance both in  
301 Experiment 2A (accuracy:  $\chi^2(2) = 1023.00, p < .001$ ; RT:  $F(2,25619) = 164.34, p < .001$ ) and  
302 Experiment 2B (accuracy:  $\chi^2(2) = 767.30, p < .001$ ; RT:  $F(2,21189) = 170.16, p < .001$ ), with lower  
303 accuracy and higher RT when trial difficulty was higher (all post-hoc comparisons:  $ps < .02$ ). There  
304 was no interaction between feedback condition and trial difficulty on RT and accuracy in either  
305 Experiment 2A or 2B (all  $ps > .05$ ).

306 After demonstrating that the feedback did not influence task performance itself, we next  
307 turn towards confidence ratings. In line with the feedback presented during the training phase  
308 (Figure 4A and 4B), the data of the testing phase revealed that  $\alpha$ -manipulated feedback in  
309 Experiment 2A had an effect on confidence ratings within correct trials ( $F(2,39) = 4.86, p = .01$ ), but  
310 not within error trials ( $F(2,45) = .87, p = .43$ ; Figure 4C). Note that this finding should be interpreted  
311 with caution, since the interaction between accuracy and feedback was not significant ( $F(2,44) = .62,$   
312  $p = .54$ ). Turning to Experiment 2B, in line with the predictions there was an effect of feedback  
313 condition on confidence ratings in both correct trials ( $F(2,33) = 8.86, p < .001$ ) and in error trials

314 ( $F(2,36) = 4.28, p = .02$ ; Figure 4D). Here again, no interaction between accuracy and feedback  
315 condition was found ( $F(2,35) = .29, p = .75$ ). Lastly, trial difficulty had an effect on confidence ratings  
316 in both Experiment 2A ( $F(2,25633) = 75.21, p < .001$ ) and 2B ( $F(2,253) = 33.49, p < .001$ ). We found no  
317 interaction between trial difficulty and feedback condition (Experiment 2A:  $F(4,25625) = 2.37, p =$   
318  $.05$ ; Experiment 2B:  $F(4,20385) = 1.70, p = .15$ ). Overall, these results corroborate the predicted  
319 pattern and show a clearly dissociable effect of feedback on confidence ratings according to the  
320 parameter manipulated in the feedback generation.

321 **LDC model fits.** We next performed model comparison to explore whether the different patterns of  
322 confidence ratings observed in Experiment 2A and 2B would be best explained by a change in the  
323 targeted parameter (i.e. a change in  $\alpha$  in Experiment 2A and a change in  $\beta$  in Experiment 2B). Two  
324 candidate LDC models were fit to the accuracy, RT and confidence data of both experiments. Each  
325 model differed in whether  $\alpha$  or  $\beta$  was fixed between feedback conditions: in the  $\alpha$ -free model, only  $\alpha$   
326 was allowed to vary between feedback conditions, whereas in the  $\beta$ -free model, only  $\beta$  was allowed  
327 to vary between feedback conditions. As recommended in Palminteri et al. (2017), we investigated  
328 how well simulations from the best-fitting parameters from both the  $\alpha$ -free and the  $\beta$ -free models  
329 were able to reproduce the observed behavioral effects. Specifically, we defined a confidence  
330 contrast that captured the qualitative signatures seen in the feedback presented. Since the  
331 difference in feedback between the baseline and the plus condition was negligible relative to how  
332 both conditions differed from the minus condition in both experiments, we computed our confidence  
333 contrast as average confidence in the minus condition subtracted from average confidence in the  
334 baseline and the plus condition. Figure 4E-F show the empirical confidence contrast as well as the  
335 distribution of the mean predicted confidence contrast for both the  $\alpha$ -free and the  $\beta$ -free model  
336 obtained via bootstrapping. In Experiment 2A, the confidence contrasts predicted by both the  $\alpha$ -free  
337 and the  $\beta$ -free model was highly similar for correct trials, and both matched well to the empirical  
338 data. However, while the  $\alpha$ -free model closely captured the confidence contrast in errors and hence  
339 the interaction, the  $\beta$ -free model overestimated the effect in errors, which led it to underestimate  
340 the interaction. Similarly, in Experiment 2B, both models accurately captured the empirical  
341 confidence contrast in correct trials. Additionally, the  $\beta$ -free model nicely reproduced both the  
342 empirical confidence contrast in error trials and the interaction, whereas the  $\alpha$ -free model clearly  
343 underestimated the confidence contrast in error trials, which led to predicting an interaction that  
344 was not present in the empirical data.

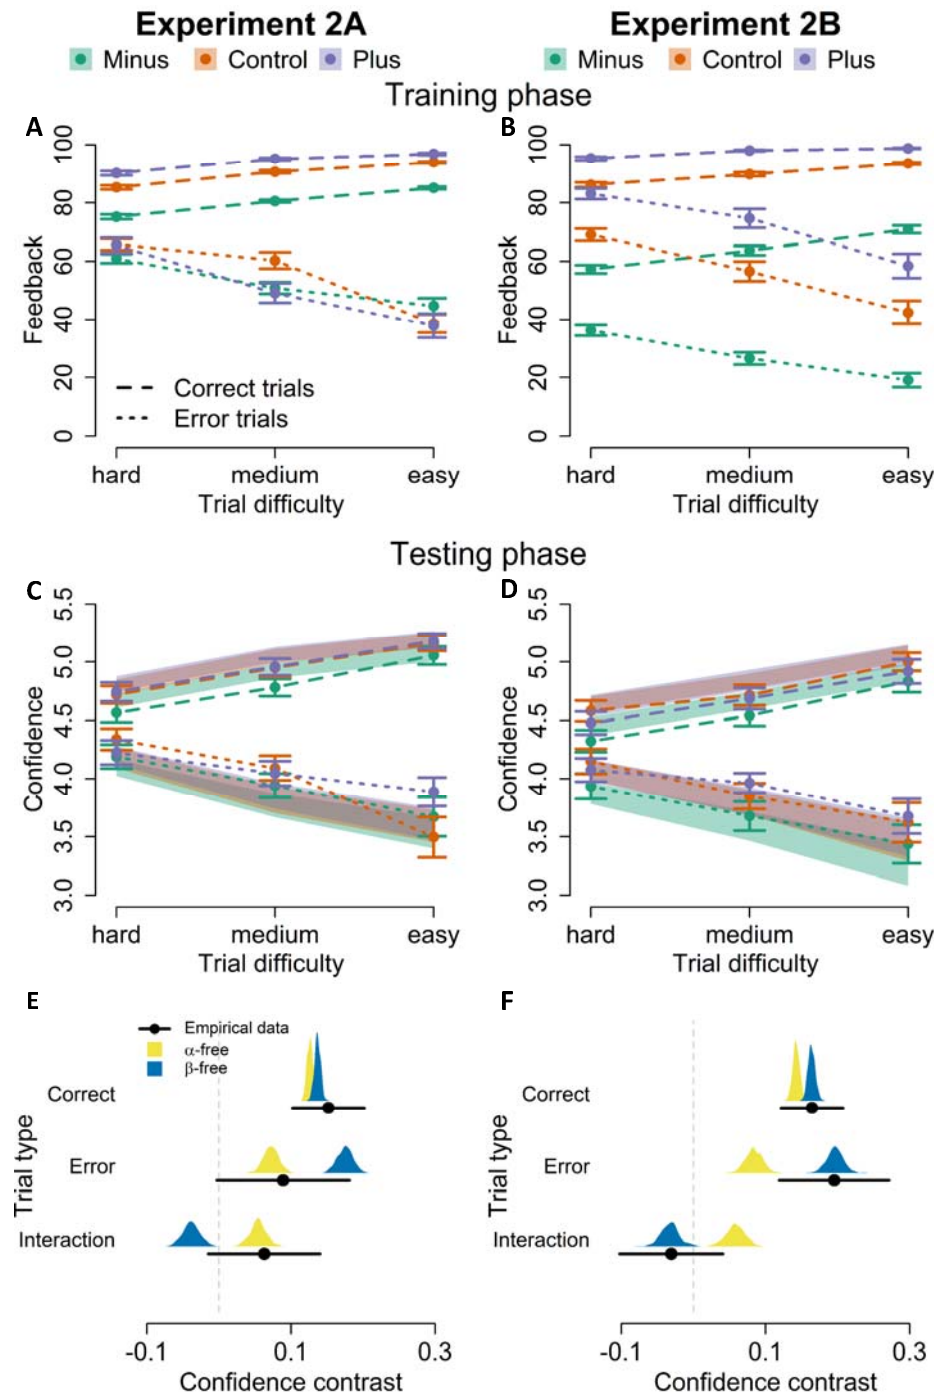

345

346 **Figure 4.** A key prediction of the LDC model is that participants should be sensitive to the specific  
 347 parametrization of confidence proposed by the model. To test this, Experiment 2 provided participants with  
 348 probabilistic feedback generated by the LDC model. Critically, LDC based feedback was generated using  
 349 different levels of  $\alpha$  or different levels of  $\beta$ . **A.** Changing  $\alpha$  influences the confidence for correct trials but not  
 350 for errors. **B.** Changing  $\beta$  influences feedback for both corrects and errors. The pattern that we saw in the  
 351 feedback (which effectively are our predictions) was also seen in the behavioral data. **C.**  $\alpha$ -manipulated  
 352 feedback influenced confidence reports for correct but not error trials. **D.**  $\beta$ -manipulated feedback influenced  
 353 confidence reports on both correct and error trials. **E.** Fitting the LDC model to the empirical data of  
 354 Experiment 2 revealed that data in the  $\alpha$ -manipulated feedback was best explained by a model in which  $\alpha$  was

355 allowed to vary. F. Data from the  $\beta$ -manipulated feedback was best explained by a model in which  $\beta$  was  
356 allowed to vary. To visualize this, we computed confidence contrasts for the empirical data (black lines), as well  
357 as for the  $\alpha$ -free (yellow distribution) and  $\beta$ -free (blue distribution) model fit, separately for corrects and errors.  
358 “Interaction” refers to the difference between the confidence contrast in corrects and errors. *Note: black dots*  
359 *correspond to the average empirical contrast, distributions correspond to the bootstrapped mean predicted*  
360 *confidence contrasts. Error bars and shaded areas represent empirical and model-simulated SEM, respectively.*

361 To further confirm that the  $\alpha$ -free (resp.  $\beta$ -free) model is the most likely to explain the results  
362 of Experiment 2A (resp. 2B), we additionally quantified the goodness-of-fit of each model using  
363 Bayesian information criterion (BIC). Two additional candidate models were included in that analysis:  
364 a null model where neither  $\alpha$  nor  $\beta$  varied between feedback conditions and a full model where both  
365  $\alpha$  and  $\beta$  were free to vary between conditions. Table 1 reports the difference in BIC of each candidate  
366 model compared to the best model, separately for both experiments. A first conclusion that can be  
367 drawn, is that both the  $\alpha$ -free and  $\beta$ -free model outperformed the null model (i.e., providing strong  
368 evidence for a change in the parameters) as well as the full model (i.e., providing strong evidence for  
369 a *selective* change in the parameters). Second, as expected the  $\alpha$ -free model showed the lowest BIC  
370 for the data of Experiment 2A. Surprisingly though, the  $\alpha$ -free model also slightly outperformed the  
371  $\beta$ -free model in Experiment 2B. Overall, the difference in BIC between the  $\alpha$ -free and the  $\beta$ -free  
372 models appears marginal compared to how strongly they each outperformed the null and full  
373 models. Additionally, the difference in BIC between the  $\alpha$ -free and the  $\beta$ -free models was bigger in  
374 Experiment 2A ( $\Delta_{BIC} = 4.15$ ), where the  $\alpha$ -free model was expected to be the best performing  
375 model, compared to the difference observed in Experiment 2B ( $\Delta_{BIC} = 2.54$ ). Applying categorical  
376 cutoffs to describe the magnitude of the evidence in favor of the  $\alpha$ -free model in both experiments,  
377 such as the rule of thumb proposed by Burnham & Anderson (2004), leads to conclude that the  $\alpha$ -  
378 free model has considerably more support than the  $\beta$ -free model in Experiment 2A, but only weak  
379 support in Experiment 2B. Taken together, these results suggest that theoretically motivated  
380 confidence manipulations can lead to specific and theoretically predicted changes in confidence.

| Model          | $\Delta BIC$  |               |
|----------------|---------------|---------------|
|                | Experiment 2A | Experiment 2B |
| Null           | 21.02         | 23.81         |
| $\alpha$ -free | 0             | 0             |
| $\beta$ -free  | 4.15          | 2.54          |
| Full           | 19.58         | 19.42         |

381 **Table 1.** Model comparison expressed in distance in BIC from the best-fitting model.

382

383

## Discussion

384           How to incorporate the sense of confidence in models of decision-making has been the focus  
385 of much recent work. An influential framework is based on the Bayesian interpretation of confidence  
386 (3, 32–34), namely that confidence reflects the probability of being correct given both accumulated  
387 evidence and elapsed time (14, 15, 17). In order to accurately compute this probability, it is  
388 necessary to know how to compute confidence based on the available data (evidence and time).  
389 Currently, a computationally plausible account describing how individuals learn this mapping is  
390 lacking. In the current work, we introduced the LDC model, which provides a tractable and flexible  
391 account of decision confidence. Using simulations, we first showed that LDC provides a highly reliable  
392 approximation of the true probability correct. Fitting this model to empirical data revealed that LDC  
393 accounts very well for human confidence ratings. Critically, using a novel feedback manipulation, we  
394 validated two key predictions from the model, namely that 1) changes in confidence can be  
395 independent of performance and 2) independently manipulating the reliability ( $\alpha$ ) and bias ( $\beta$ )  
396 parameters elicit clearly dissociable and identifiable effects on confidence.

### 397 **Introducing tractability and flexibility to decision confidence modelling**

398           The LDC model belongs to the family of DDM-based models of decision confidence. Here,  
399 confidence is conceptualized as a (Bayesian) readout of the probability of a correct choice given  
400 evidence, time and choice. Existing models following that approach have been successful in  
401 explaining a wealth of data, including the link between confidence and RT (14, 17), and deviations  
402 from accuracy through the contribution of priors (18, 19). Estimating the probability correct based on  
403 the available data, however, is computationally intractable. The LDC model therefore proposes to  
404 approximate the Bayesian readout with a logistic function, offering a tractable approach of how  
405 humans compute confidence.

406           To increase flexibility and account for deviations from optimality, the LDC model relies on  
407 two free parameters, which control the reliability of evidence ( $\alpha$ ) and general biases ( $\beta$ ) in the  
408 computation of confidence. A different class of confidence models that can account for biases and  
409 deviations between confidence and accuracy is based on Signal Detection Theory (SDT) framework  
410 (35–40). These models typically either assume the existence of metacognitive noise (37–39), and/or  
411 consider that confidence is not entirely derived from the same signal as the primary decision (35–38,  
412 40). A recent study comparing the different SDT models of confidence on simple perceptual tasks  
413 showed that confidence is simply computed as a noisy readout of the evidence used for the primary  
414 decision (41). Although the LDC model is grounded within the DDM tradition which conceptualizes  
415 confidence as the Bayesian probability correct, it does not critically hinge upon the specifics of the

416 DDM. It would be straightforward to construct a simplified version of the LDC model which ignores  
417 the element of time. This would allow to directly compare the LDC approach to recent SDT models of  
418 confidence. Crucially, with its parameters, our model can flexibly account the different types of  
419 idiosyncrasies, biases and deviation from the optimal Bayesian readout (21–24), which are all merged  
420 into a single metacognitive noise parameter in most SDT frameworks.

#### 421 **Confidence can vary independently from task performance**

422 In both Experiments, we observed that decision confidence was influenced by the feedback  
423 manipulation, whereas objective performance was not. This rules out an interpretation whereby the  
424 feedback influenced task performance and changes in confidence simply reflect this change in  
425 performance. Indeed, some previous work has shown that changes in confidence can be explained by  
426 subtle differences in RT (14, 42). This was not the case in the current experiments. As such, it is  
427 unlikely that Bayesian read-out models can account for the effects observed in the current work, as  
428 they do not allow for confidence-specific parameters (14–16; for a counterexample see 17). In  
429 contrast, LDC nicely captured the effect of feedback on confidence in the absence of changes in  
430 objective performance, thus attesting to the flexible nature of the LDC model. Previous studies have  
431 unraveled several other factors that influence the reported level of decision confidence, while  
432 leaving task performance unaffected, for example emotional states (27, 43), working memory  
433 content (29) and age (44, 45). More broadly, dissociations between performance and metacognition  
434 have long been reported in cases such as blindsight (10, 46), where individuals with lesions in primary  
435 visual cortex show above chance level performance at visual tasks despite reporting no awareness of  
436 the stimuli. At the opposite end of the spectrum, change blindness (i.e. failure to detect major  
437 differences between two images while they flicker off and on) is a typical example of a metacognitive  
438 error where individuals believe they would be able to detect such major changes, despite being  
439 unable to do so (11). These examples highlight how ubiquitous dissociations between performance  
440 and metacognition are. By incorporating free parameters controlling for evidence reliability and bias  
441 into the computation of confidence, the LDC model is in principle flexible enough to account for all  
442 these dissociations reported in the literature.

#### 443 **Humans can independently tune evidence reliability and bias in confidence**

444 In Experiment 2A and 2B, we aimed to selectively manipulate confidence ratings according to  
445 each parameter of the LDC. By providing model-generated feedback from different  $\alpha$ 's in Experiment  
446 2A and different  $\beta$ 's in Experiment 2B, we revealed clearly distinct patterns of confidence ratings  
447 according to the parameter manipulated. Moreover, the empirically observed patterns were best  
448 captured by models where the manipulated parameter was set as a free parameter (e.g.  $\alpha$ -free



449 model when feedback was  $\alpha$ -manipulated). These results imply that individuals can change their  
450 computation of confidence consistently with our parameterization of confidence, providing strong  
451 validating evidence in favor of LDC. This observation raises the intriguing possibility that individuals  
452 might exert control over the parameters governing the computation of confidence in a way that  
453 maximizes utility. Intuitively, computing confidence in such a way that it closely matches the  
454 Bayesian readout seems like the rational strategy to optimize utility, as it would allow to optimize  
455 behavior based on the best possible internal evaluation of that behavior (5, 7, 9). In some contexts,  
456 however, other factors than informativeness play a role in the utility of confidence. When competing  
457 for shared limited resources, expressing overconfidence plays a key role in convincing other agents  
458 not to compete for the resource (i.e. “bluffing”; 47, 48). Errors caused by overconfidence, though,  
459 bear a high cost in such strategy. In such a context, the optimal way to compute confidence seems to  
460 be an increase in the evidence reliability estimate ( $\alpha$ ), which will lead to higher confidence for  
461 scenarios with much evidence (i.e., overconfidence when you are likely to win the competition) but  
462 lower confidence for scenarios with little evidence (i.e., when you are likely to lose the competition).  
463 Increasing  $\beta$  in this scenario is likely suboptimal because this produces overall high confidence, also  
464 for scenarios with little evidence. The opposite scenario might be true in a social decision-making  
465 context. If confidence is used to assert influence rather than to convey accuracy (49), the optimal  
466 strategy might be an overall increase in  $\beta$ , resulting in general overconfidence (i.e. irrespective of  
467 accuracy) to push forward one’s choice. These examples show that what is traditionally treated as  
468 deviations from the optimal Bayesian readout can sometimes be considered as optimal through the  
469 lenses of utility maximization.

#### 470 **Beyond dichotomies with model-informed feedback**

471 In contrast with the binary “correct/error” feedback typically provided in lab experiments,  
472 feedback received in daily life is not always clear-cut. Individuals must often make sense of noisy and  
473 probabilistic feedback cues (e.g. how should a street-artist interpret a subtle nod from a spectator?).  
474 Continuous feedback has been used in the past to communicate performance relative to other  
475 (hypothetical) participants (19, 50) or to give average accuracy over several past trials (51, 52).  
476 However, in the current work we designed a novel feedback manipulation which provides continuous  
477 feedback about choice accuracy on a trial-by-trial basis. It is important to note that our instructions  
478 simply stated that feedback would reflect the probability of being correct on a single trial, without  
479 much more explanation as to how this proportion was calculated. A skeptical participant could  
480 reasonably doubt the trustworthiness of the feedback, since it might seem unlikely that we provide  
481 an “accurate” probability of being correct on a single trial basis (e.g. is a feedback of 80% vs 70%  
482 really informative, or are the values pure noise added by the experimenter). Despite these potential

483 obstacles, our feedback manipulation did produce the confidence patterns we predicted, hence  
484 validating our model-generated feedback approach. This nuanced way of providing feedback goes  
485 beyond the mere distinction between dichotomous valid versus invalid feedback (53), and offers a  
486 promising framework to control the level of ambiguity and informativeness of trial-by-trial feedback,  
487 allowing to study in a more fine-grained manner how individuals process and are impacted by more  
488 realistic, ambiguous feedback (54, 55).

#### 489 **Interpreting the LDC parameters**

490 An appealing property of computational models is that their parameters often have clear  
491 interpretations, and can be selectively manipulated (13, 56), although it is subject of recent debate  
492 (57). Similarly, in LDC, evidence and time are mapped onto confidence by means of a reliability  
493 parameter,  $\alpha$ , and a confidence bias parameter,  $\beta$ . Our reliability parameter,  $\alpha$ , can be interpreted as  
494 an individual's estimate of the precision of evidence. This interpretation is similar to the recently  
495 proposed concept of "meta-uncertainty", which is described as "the subject's uncertainty about the  
496 uncertainty of the variable that informs their decision" (58). In both the LDC model and Boundy-  
497 Singer et al.'s CASANDRE model, one's estimate of evidence reliability weighs how evidence is used  
498 to compute confidence. Note that an important difference is that in CASANDRE the estimate is  
499 assumed to be correct on average (i.e. individuals are assumed to have an uncertain, but on average  
500 correct estimate of evidence reliability), whereas one of the key points of the LDC model is that  
501 participants can have incorrect values of  $\alpha$ .

502 The second parameter of LDC,  $\beta$ , globally increases or decreases confidence. It  
503 straightforwardly relates to the metacognitive bias described in other models of confidence (59). In  
504 light of this interpretation of  $\alpha$  and  $\beta$ , one can further interpret specific patterns in the data. For  
505 example, in Experiment 1, we observed a change in  $\alpha$  in response to negative feedback (with a  
506 significantly lower estimated  $\alpha$  compared to the other two conditions), indicating that participants  
507 judged evidence as less reliable after receiving negative feedback. On the contrary, we observed a  
508 change in  $\beta$  after positive feedback (with a significantly higher estimated  $\beta$  compared to the other  
509 two conditions), suggesting a general overconfidence bias after receiving positive feedback. This  
510 dissociation suggests that despite similar effects at the behavioral level, the LDC model allows to  
511 further tease apart the origins of confidence biases e.g. in response to positive vs negative feedback.

512 Finally, we note that in the current parameterization of confidence, identical to the Bayesian  
513 readout, confidence always depends on  $\sqrt{t}$ . However, the influence of time on confidence might vary  
514 according to the task or individual. To account for such hypothetical sources of variability, one could  
515 expand the LDC model by further parameterizing the influence of time with a third parameter,  $\gamma$ ,

516 and replace  $\sqrt{t}$  in Eq. (3) with  $t^\gamma$ . The model then has an accurate calibration of how time influences  
517 confidence when  $\gamma = 0.5$ , and overweighs (resp. underweighs) time in the computation of  
518 confidence when  $\gamma > 0.5$  (resp.  $\gamma < 0.5$ ). By doing so, future work might investigate whether  
519 variability in the relation between confidence and decision time can be captured by the extended  
520 LDC model.

## 521 **Conclusion**

522 We introduced the LDC model, a new model of decision confidence that offers a tractable  
523 and flexible approximation of confidence as the Bayesian probability of making the correct decision.  
524 The model provides a low-dimensional parametrization of decision confidence which allows efficient  
525 estimation of confidence, while at the same time accounting for idiosyncrasies and different kinds of  
526 confidence biases. This parameterization of confidence was validated in two experiments showing a  
527 distinct pattern of confidence ratings after specifically manipulating the mapping according to each  
528 parameter of the model.

529

530

## Methods

### 531 **Experiment 1**

#### 532 ***Participants***

533 Fifty participants (eight men, one third gender, age:  $M = 19$ ,  $SD = 4.9$ , range 17–52) took part  
534 in Experiment 1 (two excluded due to chance level performance). All participants participated in  
535 return for course credit and read and signed a written informed consent at the start of the  
536 experiment. All procedures were approved by the KU Leuven ethics committee. Detailed methods  
537 and analyses for Experiment 1 have already been reported in Van Marcke et al. (2022). We briefly  
538 report the general procedure here.

#### 539 ***Procedure***

540 Participants completed three decision-making tasks: a dot color task, a dot number task and  
541 a letter discrimination task. Each task started with 120 training trials. Feedback during training was  
542 presented at the end of blocks of 24 trials. Unknown to participants, feedback was predetermined to  
543 be either good, average or bad for a specific task, and feedback scores were randomly sampled  
544 according to the feedback condition. Each participant received good feedback on one task, average  
545 feedback on another task, and bad feedback on a third task (order and mapping with tasks  
546 counterbalanced between participants). After the training phase of a task, participants performed  
547 216 test trials where feedback was no longer provided. Instead, confidence ratings were queried at  
548 the end of each trial. For each task, there were three levels of stimulus difficulty (easy, average, or  
549 hard).

550 **Dot color task.** On each trial, participants decided whether a box contained more (static)  
551 blue or red dots. The total number of dots was always 80, with differing proportions of red or blue  
552 dots depending on the difficulty condition. The position of dots was randomly generated on each  
553 trial.

554 **Dot number task.** On each trial, two boxes were presented, one of which contained 50 dots  
555 and the other more or less than 50 dots. Participants decided which of the two fields contained the  
556 largest number of dots. The exact number of dots in the variable field differed depending on the  
557 difficulty condition. The position of dots was randomly generated on each trial.

558 **Letter discrimination task.** On each trial, participants decided whether a field contained  
559 more X's or O's. The total number of X's and O's was always 80, with differing proportions of X's or  
560 O's depending on the difficulty condition. The position of the letters was randomly generated on  
561 each trial.

### 562 **Experiment 2**

563 **Participants**

564 Forty-three participants (8 male, age:  $M=18.49$ ,  $SD=1.03$ , range 16-22) took part in Experiment 2A.  
565 Forty-two participants (9 male, age:  $M=18.83$ ,  $SD = 2.05$ , range 17-29) took part in Experiment 2B.  
566 Due to chance performance on at least one of the tasks, we removed 3 participants from Experiment  
567 2A and 3 participants from Experiment 2B. Six additional participants were removed from  
568 Experiment 2B due to (almost) no variability in their confidence reports (i.e. used the same report on  
569 more than 90% of the trials). All participants took part in return for course credit and signed  
570 informed consent at the start of the experiment. All procedures were approved by the local ethics  
571 committee.

572 **Stimuli and apparatus**

573 All experiments were conducted on 22-inch DELL monitors with a 60 Hz refresh rate, using  
574 PsychoPy3 (Peirce et al., 2019). All stimuli were presented on a black background centered on the  
575 middle of the screen (radius  $2.49^\circ$  visual arc). Stimuli for the dot number task were presented in two  
576 equally sized boxes (height  $20^\circ$ , width  $18^\circ$ ) at an equal distance from the center of the screen. Stimuli  
577 for all other tasks were presented in one box (height  $22^\circ$ , width  $22^\circ$ ).

578 **Procedure**

579 In both experiments, participants completed three decision-making tasks: a dot color task, a  
580 shape discrimination task and a letter discrimination task. Each task started with 108 training trials.  
581 After each choice, participants rated their confidence level and then received (continuous) feedback  
582 about their performance. After the training phase of a task, a test phase of 216 trials followed which  
583 was identical to the training phase, except that feedback was omitted. Every trial was assigned one of  
584 three possible difficulty levels. The difficulty levels were matched between the three tasks based on a  
585 pilot staircase session. For all tasks, a trial started with a fixation cross that was presented for 500  
586 ms, after which the stimulus appeared for 200 ms or until a response was given. Participants  
587 indicated their choice using the C or N key using the thumbs of both hands. There was no time limit  
588 for responding, although participants were instructed to respond as fast and accurately as possible.  
589 After each choice, participants rated their confidence on a 6-point scale, labeled from left to right:  
590 'sure error', 'probably error', 'guess error', 'guess correct', 'probably correct', and 'sure correct'  
591 (reversed order for half the participants). Confidence was indicated using the 1, 2, 3, 8, 9 and 0 keys  
592 at the top of the keyboard with the ring, middle and index fingers of both hands. There was no time  
593 limit for indicating confidence. During the training phase only, a trial ended with a visual presentation  
594 of feedback. An empty horizontal rectangle was filled in white starting from the left end of the  
595 rectangle (reversed order for half the participants, matched to the confidence counterbalancing). The  
596 proportion filled corresponded to the probability that the response was correct (e.g. halfway filled if

597 feedback is 50%). Ticks at the 0, 25, 50, 75 and 100 percent marks were respectively labeled 'sure  
598 error', 'probably error', 'random chance', 'probably correct' and 'sure correct'.

599 On each trial, participants decided whether a box contained more elements from one out of two  
600 categories. In the letter discrimination task, elements were A's or B's, in the dot color task, blue or  
601 red dots and in the shape discrimination task, squares and circles. The total number of elements in a  
602 box was always 80, with the exact proportion of each element depending on the difficulty condition.  
603 The position of the elements was randomly generated on each trial.

#### 604 ***Model-generated feedback***

605 Instead of binary feedback (correct/error), feedback during the training phase after each trial  
606 was provided in the form of a continuous value. Participants were told that this probability reflected  
607 the probability that their response was correct. In reality, the feedback was generated by our model  
608 of confidence. To do so, we estimated the single-trial evidence accumulation process online (i.e.,  
609 during the experiment). To do so, we assumed that performance was equivalent to the average  
610 performance observed in piloting sessions. In other words, we assumed that the current decision  
611 threshold and drift rate were equal to the average decision threshold and drift rate from piloting  
612 sessions. At the moment a decision was made, the evidence accumulation process just reached the  
613 decision threshold. We thus inferred that the amount of accumulated evidence at the time of  
614 decision was equal to the average decision threshold estimated from the pilot sessions. Then, to  
615 estimate the total amount of accumulated evidence at the time of the confidence report, we added  
616 the post-decisional evidence estimated by running a random-walk for a duration fixed to the  
617 observed confidence RT and with a drift rate set to the average drift rate estimated from the pilot  
618 sessions (the sign of which varied whether the response was correct or not). Feedback was thus  
619 equal to model confidence computed according to a fixed ( $\alpha$ ,  $\beta$ ) pairing (the value of which depended  
620 on the condition and experiment one is in) from that total evidence and the total time (decision RT +  
621 confidence RT).

#### 622 ***Feedback conditions***

623 In a baseline condition, the feedback presented to participants reflected the actual model-  
624 generated probability of a choice being correct. To get the value of  $\alpha$  and  $\beta$  that best approximate  
625 the true probability of a choice being correct, we estimated both parameters based on the heatmap  
626 generated by the drift rates observed in the pilot sessions. In the baseline condition,  $\alpha$  was thus set  
627 to 18 and  $\beta$  to 0. In Experiment 2A, for one task feedback was computed using a lower value of  $\alpha$   
628 (namely 9), and for another task feedback was computed using a higher value of  $\alpha$  (namely 36;

629 termed “ $\alpha$ -plus” condition). The association between the manipulation of  $\alpha$  and the task was  
630 counterbalanced across participants. In Experiment 2B, feedback was provided according to the  
631 baseline condition in one task, using a lower value of  $\beta$  in another task (-1), and using a higher value  
632 of  $\beta$  in another task (1).

### 633 ***Statistical analyses***

634 All data were analyzed using mixed effects models. We started from models including the  
635 fixed factors and their interaction(s), as well as a random intercept for each participant. These  
636 models were then extended by adding random slopes, only when this significantly improved model  
637 fit. Confidence ratings and RT were analyzed with linear mixed effects models, for which we report  
638  $F$  statistics and the degrees of freedom as estimated by Satterthwaite’s approximation. Accuracy was  
639 analyzed using a generalized linear mixed model, for which we report  $X^2$  statistics. All model fit  
640 analyses were done using the lmerTest R package (60).

### 641 ***Bounded evidence accumulation***

642 We modeled choice and RT data using the drift diffusion model (DDM), a popular variant of  
643 the wider class of accumulation-to-bound models. In the DDM, noisy evidence (representing the  
644 difference between the evidence for both options) is accumulated, the strength of which is  
645 controlled by a drift rate  $v$ , until one of two decision thresholds  $a$  or  $-a$  is reached. Non-decision  
646 components are captured by a non-decision time parameter  $ter$ . To simulate data from the model,  
647 random walks were used as a discrete approximation of the continuous diffusion process of the drift  
648 diffusion model. Each simulated random walk process started at  $z*a$  (here,  $z$  was an unbiased  
649 starting point fixed to 0). At each time step  $\tau$ , accumulated evidence changed by  $\Delta$  with  $\Delta$  given in Eq.  
650 (3):

$$\Delta = v\tau + \sigma\sqrt{\tau} N(0,1) \quad (3)$$

651 Within-trial variability is given by  $\sigma$ . In all simulations,  $\tau$  was set to 1 ms, and  $\sigma$  was fixed to .1.

### 652 ***Model fitting***

653 Model predictions were obtained from the random-walk simulation described above.  
654 Evidence continued to accumulate after threshold crossing for a duration that was sampled from the  
655 confidence RT distribution of the trials being fitted. Note that this sampling was done without  
656 replacement, ensuring that the simulated confidence RT distribution exactly matched the empirically  
657 observed confidence RT distribution. The number of trials being simulated was equal to 20 times the  
658 number of empirical trials being fitted to ensure that every trial of the empirical confidence RT

659 distribution is being simulated an equal amount of time. Given that the model-generated confidence  
660 comes on a continuous scale from 0 to 1, we binned the model output into 6 equally-spaced bins.

661 Accuracy and RT data of each task and participant was estimated using 5 DDM parameters: non-  
662 decision time, decision threshold and three drift rate parameters (one for each trial difficulty level).  
663 Additionally,  $\alpha$  and  $\beta$  were fitted to the confidence judgments, separately for each feedback  
664 condition. We implemented quantile optimization, and computed the proportion of trials falling  
665 within each of six groups formed by quantiles .1, .3, .5, .7 and .9 of RT, separately for corrects and  
666 errors. Similarly with confidence ratings, we computed the proportion of trials resulting at each of  
667 the 6 levels of confidence judgment separately for corrects and errors. The resulting objective  
668 function consisted in minimizing the sum of squared errors described in Eq (4):

$$SSE = \sum_{k \in \{0;1\}} \sum_{i=1}^{N_q} (oRT_{i,k} - pRT_{i,k})^2 + \sum_{j=1}^{N_{cl}} (oCJ_{j,k} - pCJ_{j,k})^2 \quad (4)$$

669 with  $N_q = N_{cl} = 6$  the number of RT groups/possible confidence value,  $oRT_{i,k}$  and  $pRT_{i,k}$   
670 respectively the proportions of observed and predicted trials falling within quantile  $i$  of RT,  
671 separately for corrects ( $k = 1$ ) and errors ( $k = 0$ ), and  $oCJ_{i,k}$  and  $pCJ_{i,k}$  reflecting their counterpart  
672 for confidence. Models were fitted using a differential evolution algorithm (61), as implemented in  
673 the DEoptim R package (62). The population size was set to 10 times the number of parameters to  
674 estimate. The algorithm stopped once no improvement of the objective function was observed for  
675 the last 100 generations.

### 676 **Model comparison**

677 All candidate models for the model comparison were based on the same estimated DDM parameters  
678 fitted separately to accuracy and RT data (i.e. minimizing the first term of the SSE in Eq. (4)). Each  
679 candidate model was then fit to confidence ratings (i.e. minimizing the second term of the SSE in Eq.  
680 (4)). BIC values for model comparison were computed as follows (63):

$$BIC = k \ln(n) + n \ln\left(\frac{SSE}{n}\right) \quad (5)$$

681 with  $k$  the number of free parameters and  $n$  the number of data points. BIC values for each model  
682 represented in Table 1 correspond to the mean BIC over participants. Bootstrapped 95% confidence  
683 intervals of confidence contrasts were obtained by simulating 500 datasets based on the fits of each  
684 participant and then computing the mean confidence contrasts of each repetition. The 95%



685 confidence interval was computed as the .025 and .975 quantiles of the distribution formed by the  
686 bootstrapping.

#### 687 **Code availability**

688 All raw data and analysis code can be freely accessed at [https://github.com/pledenmat/ldc\\_paper](https://github.com/pledenmat/ldc_paper).

689

#### 690 **Acknowledgements**

691 The research was supported by a starting grant from the KU Leuven (STG/20/006), a Francqui Start-  
692 Up Grant (PXF-D8830) and a grant from the Research Foundation Flanders, Belgium (FWO-  
693 Vlaanderen) (G0B0521N).

694

695

696

## References

- 697 1. J. I. Sanders, B. Hangya, A. Kepecs, Signatures of a Statistical Computation in the  
698 Human Sense of Confidence. *Neuron* **90**, 499–506 (2016).
- 699 2. R. Kiani, M. N. Shadlen, Representation of Confidence Associated with a Decision by  
700 Neurons in the Parietal Cortex. *Science* **324**, 759–764 (2009).
- 701 3. F. Meyniel, M. Sigman, Z. F. Mainen, Confidence as Bayesian Probability: From Neural  
702 Origins to Behavior. *Neuron* **88**, 78–92 (2015).
- 703 4. A. Boldt, C. Blundell, B. De Martino, Confidence modulates exploration and  
704 exploitation in value-based learning. *Neurosci. Conscious.* **2019**, niz004 (2019).
- 705 5. J. Drugowitsch, A. G. Mendonça, Z. F. Mainen, A. Pouget, Learning optimal decisions  
706 with confidence. *Proc. Natl. Acad. Sci.* **116**, 24872–24880 (2019).
- 707 6. R. Frömer, *et al.*, Response-based outcome predictions and confidence regulate feedback  
708 processing and learning. *eLife* **10**, e62825 (2021).
- 709 7. T. Balsdon, V. Wyart, P. Mamassian, Confidence controls perceptual evidence  
710 accumulation. *Nat. Commun.* **11**, 1753 (2020).
- 711 8. K. Desender, A. Boldt, T. Verguts, T. H. Donner, Confidence predicts speed-accuracy  
712 tradeoff for subsequent decisions. *eLife* **8**, e43499 (2019).
- 713 9. K. Desender, A. Boldt, N. Yeung, Subjective Confidence Predicts Information Seeking  
714 in Decision Making. *Psychol. Sci.* **29**, 761–778 (2018).
- 715 10. L. Weiskrantz, E. Warrington, M. D. Sanders, J. Marshall, Visual capacity in the  
716 hemianopic field following a restricted occipital ablation. *Brain J. Neurol.* **97** (1974).
- 717 11. D. T. Levin, N. Momen, S. B. Drivdahl, D. J. Simons, Change Blindness Blindness: The  
718 Metacognitive Error of Overestimating Change-detection Ability. *Vis. Cogn.* **7**, 397–412  
719 (2000).
- 720 12. S. M. Fleming, J. Ryu, J. G. Golfinos, K. E. Blackmon, Domain-specific impairment in  
721 metacognitive accuracy following anterior prefrontal lesions. *Brain* **137**, 2811–2822  
722 (2014).
- 723 13. R. Ratcliff, G. McKoon, The Diffusion Decision Model: Theory and Data for Two-  
724 Choice Decision Tasks. *Neural Comput.* **20**, 873–922 (2008).
- 725 14. R. Kiani, L. Corthell, M. N. Shadlen, Choice Certainty Is Informed by Both Evidence  
726 and Decision Time. *Neuron* **84**, 1329–1342 (2014).
- 727 15. R. Moreno-Bote, Decision Confidence and Uncertainty in Diffusion Models with  
728 Partially Correlated Neuronal Integrators. *Neural Comput.* **22**, 1786–1811 (2010).
- 729 16. T. J. Pleskac, J. R. Busemeyer, Two-stage dynamic signal detection: A theory of choice,  
730 decision time, and confidence. *Psychol. Rev.* **117**, 864 (2010).

- 731 17. Calder-Travis, J., Charles, L., Bogacz, R., & Yeung, N. (2020). *Bayesian confidence in*  
732 *optimal decisions*. PsyArXiv. <https://doi.org/10.31234/osf.io/j8sxx>
- 733 18. K. Khalvati, R. Kiani, R. P. N. Rao, Bayesian inference with incomplete knowledge  
734 explains perceptual confidence and its deviations from accuracy. *Nat. Commun.* **12**, 5704  
735 (2021).
- 736 19. H. V. Van Marcke, P. L. Denmat, T. Verguts, K. Desender, Manipulating prior beliefs  
737 causally induces under- and overconfidence. 2022.03.01.482511 (2022).
- 738 20. S. R. Bowling, M. T. Khasawneh, S. Kaewkuekool, B. R. Cho, A logistic approximation  
739 to the cumulative normal distribution. *J. Ind. Eng. Manag.* **2**, 114–127 (2009).
- 740 21. J. Ais, A. Zylberberg, P. Barttfeld, M. Sigman, Individual consistency in the accuracy  
741 and distribution of confidence judgments. *Cognition* **146**, 377–386 (2016).
- 742 22. T. U. Hauser, M. Allen, G. Rees, R. J. Dolan, Metacognitive impairments extend  
743 perceptual decision making weaknesses in compulsivity. *Sci. Rep.* **7**, 6614 (2017).
- 744 23. M. Rollwage, R. J. Dolan, S. M. Fleming, Metacognitive Failure as a Feature of Those  
745 Holding Radical Beliefs. *Curr. Biol.* **28**, 4014–4021.e8 (2018).
- 746 24. M. Rouault, T. Seow, C. M. Gillan, S. M. Fleming, Psychiatric Symptom Dimensions  
747 Are Associated With Dissociable Shifts in Metacognition but Not Task Performance.  
748 *Biol. Psychiatry* **84**, 443–451 (2018).
- 749 25. A. Kepecs, Z. F. Mainen, A computational framework for the study of confidence in  
750 humans and animals. *Philos. Trans. R. Soc. B Biol. Sci.* **367**, 1322–1337 (2012).
- 751 26. M. Rausch, M. Zehetleitner, The folded X-pattern is not necessarily a statistical  
752 signature of decision confidence. *PLOS Comput. Biol.* **15**, e1007456 (2019).
- 753 27. M. Allen, *et al.*, Unexpected arousal modulates the influence of sensory noise on  
754 confidence. *eLife* **5**, e18103 (2016).
- 755 28. A. Boldt, V. de Gardelle, N. Yeung, The impact of evidence reliability on sensitivity and  
756 bias in decision confidence. *J. Exp. Psychol. Hum. Percept. Perform.* **43**, 1520 (2017).
- 757 29. B. Maniscalco, H. Lau, Manipulation of working memory contents selectively impairs  
758 metacognitive sensitivity in a concurrent visual discrimination task. *Neurosci.*  
759 *Conscious.* **2015**, niv002 (2015).
- 760 30. S. Palminteri, V. Wyart, E. Koehlin, The Importance of Falsification in Computational  
761 Cognitive Modeling. *Trends Cogn. Sci.* **21**, 425–433 (2017).
- 762 31. K. P. Burnham, D. R. Anderson, Multimodel Inference: Understanding AIC and BIC in  
763 Model Selection. *Sociol. Methods Res.* **33**, 261–304 (2004).
- 764 32. W. T. Adler, W. J. Ma, Comparing Bayesian and non-Bayesian accounts of human  
765 confidence reports. *PLOS Comput. Biol.* **14**, e1006572 (2018).

- 766 33. M. Constant, M. Pereira, N. Faivre, E. Filevich, Prior information differentially affects  
767 discrimination decisions and subjective confidence reports. 2022.10.26.513829 (2022).
- 768 34. L. S. Geurts, J. R. H. Cooke, R. S. van Bergen, J. F. M. Jehee, Subjective confidence  
769 reflects representation of Bayesian probability in cortex. *Nat. Hum. Behav.* **6**, 294–305  
770 (2022).
- 771 35. S. M. Fleming, N. D. Daw, Self-evaluation of decision-making: A general Bayesian  
772 framework for metacognitive computation. *Psychol. Rev.* **124**, 91–114 (2017).
- 773 36. Y. Jang, T. S. Wallsten, D. E. Huber, A stochastic detection and retrieval model for the  
774 study of metacognition. *Psychol. Rev.* **119**, 186–200 (2012).
- 775 37. B. Maniscalco, H. Lau, The signal processing architecture underlying subjective reports  
776 of sensory awareness. *Neurosci. Conscious.* **2016**, niw002 (2016).
- 777 38. M. Rausch, S. Hellmann, M. Zehetleitner, Confidence in masked orientation judgments  
778 is informed by both evidence and visibility. *Atten. Percept. Psychophys.* **80**, 134–154  
779 (2018).
- 780 39. M. Shekhar, D. Rahnev, The nature of metacognitive inefficiency in perceptual decision  
781 making. *Psychol. Rev.* **128**, 45–70 (2021).
- 782 40. A. Zylberberg, P. Barttfeld, M. Sigman, The construction of confidence in a perceptual  
783 decision. *Front. Integr. Neurosci.* **6** (2012).
- 784 41. M. Shekhar, D. Rahnev, How do humans give confidence? A comprehensive  
785 comparison of process models of metacognition (2022)  
786 <https://doi.org/10.31234/osf.io/cwrnt> (April 25, 2022).
- 787 42. A. Zylberberg, C. R. Fetsch, M. N. Shadlen, The influence of evidence volatility on  
788 choice, reaction time and confidence in a perceptual decision. *eLife* **5**, e17688 (2016).
- 789 43. S. Massoni, Emotion as a boost to metacognition: How worry enhances the quality of  
790 confidence. *Conscious. Cogn.* **29**, 189–198 (2014).
- 791 44. H. Overhoff, *et al.*, Neural correlates of metacognition across the adult lifespan.  
792 *Neurobiol. Aging* **108**, 34–46 (2021).
- 793 45. L. G. Weil, *et al.*, The development of metacognitive ability in adolescence. *Conscious.*  
794 *Cogn.* **22**, 264–271 (2013).
- 795 46. Y. Ko, H. Lau, A detection theoretic explanation of blindsight suggests a link between  
796 conscious perception and metacognition. *Philos. Trans. R. Soc. B Biol. Sci.* **367**, 1401–  
797 1411 (2012).
- 798 47. D. Johnson, J. Fowler, The Evolution of Overconfidence. *Nature* **477**, 317–20 (2011).
- 799 48. K. Li, A. Szolnoki, R. Cong, L. Wang, The coevolution of overconfidence and bluffing  
800 in the resource competition game. *Sci. Rep.* **6**, 21104 (2016).

- 801 49. D. Bang, S. Ershadmanesh, H. Nili, S. M. Fleming, Private–public mappings in human  
802 prefrontal cortex. *eLife* **9**, e56477 (2020).
- 803 50. R. Lewthwaite, G. Wulf, Social-comparative feedback affects motor skill learning. *Q. J.*  
804 *Exp. Psychol.* **63**, 738–749 (2010).
- 805 51. M. H. Herzog, M. Fahle, The role of feedback in learning a vernier discrimination task.  
806 *Vision Res.* **37**, 2133–2141 (1997).
- 807 52. L.-P. Shiu, H. Pashler, Improvement in line orientation discrimination is retinally local  
808 but dependent on cognitive set. *Percept. Psychophys.* **52**, 582–588 (1992).
- 809 53. B. Ernst, M. Steinhauser, Effects of invalid feedback on learning and feedback-related  
810 brain activity in decision-making. *Brain Cogn.* **99**, 78–86 (2015).
- 811 54. M. P. I. Becker, *et al.*, Altered emotional and BOLD responses to negative, positive and  
812 ambiguous performance feedback in OCD. *Soc. Cogn. Affect. Neurosci.* **9**, 1127–1133  
813 (2014).
- 814 55. R. Gu, Y. Ge, Y. Jiang, Y. Luo, Anxiety and outcome evaluation: The good, the bad and  
815 the ambiguous. *Biol. Psychol.* **85**, 200–206 (2010).
- 816 56. R. L. Van den Brink, P. R. Murphy, K. Desender, N. de Ru, S. Nieuwenhuis, Temporal  
817 Expectation Hastens Decision Onset But Does Not Affect Evidence Quality. *J. Neurosci.*  
818 **41**, 130–143 (2021).
- 819 57. F. Rafiei, D. Rahnev, Qualitative speed-accuracy tradeoff effects that cannot be  
820 explained by the diffusion model under the selective influence assumption. *Sci. Rep.* **11**,  
821 45 (2021).
- 822 58. Z. M. Boundy-Singer, C. M. Ziemba, R. L. T. Goris, Confidence as a noisy decision  
823 reliability estimate. 2021.12.17.473249 (2022).
- 824 59. M. Guggenmos, Reverse engineering of metacognition. *eLife* **11**, e75420 (2022).
- 825 60. A. Kuznetsova, P. B. Brockhoff, R. H. B. Christensen, lmerTest Package: Tests in  
826 Linear Mixed Effects Models. *J. Stat. Softw.* **82**, 1–26 (2017).
- 827 61. K. Price, R. M. Storn, J. A. Lampinen, *Differential Evolution: A Practical Approach to*  
828 *Global Optimization* (Springer Science & Business Media, 2006).
- 829 62. K. Mullen, D. Ardia, D. L. Gil, D. Windover, J. Cline, DEoptim: An R Package for  
830 Global Optimization by Differential Evolution (2009) (October 14, 2022).
- 831 63. A. Solway, M. M. Botvinick, Evidence integration in model-based tree search. *Proc.*  
832 *Natl. Acad. Sci.* **112**, 11708–11713 (2015).

833
